# Supplementary material
Source: Elsevier journal article supplement (https://www.sciencedirect.com/science/article/pii/S1885585721002255)
Supplement: mmc1 [file S1885585721002255:mmc1.pdf]

Díaz Guzman J, *et al.* Epidemiology of atrial fibrillation-related ischemic stroke and its association with DOAC uptake in Spain: first national population-based study 2005 to 2018

## SUPPLEMENTARY DATA

**Table 1 of the supplementary data.** ICD codes used for primary diagnosis of stroke

| Stroke type               | ICD-9  | Definition                                                              | ICD-10 | Definition                                                                            |
|---------------------------|--------|-------------------------------------------------------------------------|--------|---------------------------------------------------------------------------------------|
| <i>Ischemic stroke</i>    | 435.x  | Transient cerebral ischemia                                             | G45.x  | Transient cerebral ischemic attacks and related syndromes (excluding G45.3 and G45.4) |
|                           | 433.x1 | Occlusion and stenosis of precerebral arteries with cerebral infarction | I63.0  | Cerebral infarction due to thrombosis of precerebral arteries                         |
|                           |        |                                                                         | I63.1  | Cerebral infarction due to embolism of precerebral arteries                           |
|                           |        |                                                                         | I63.2  | Cerebral infarction due to unspecified occlusion or stenosis of precerebral arteries  |
|                           | 434.x1 | Occlusion of cerebral arteries with cerebral infarction                 | I63.3  | Cerebral infarction due to thrombosis of cerebral arteries                            |
|                           |        |                                                                         | I63.4  | Cerebral infarction due to embolism of cerebral arteries                              |
|                           |        |                                                                         | I63.5  | Cerebral infarction due to unspecified occlusion or stenosis of cerebral arteries     |
|                           |        |                                                                         | I63.8  | Other cerebral infarction                                                             |
|                           |        |                                                                         | I63.9  | Cerebral infarction, unspecified                                                      |
| <i>Hemorrhagic stroke</i> | 430    | Subarachnoid hemorrhage                                                 | I60    | Subarachnoid hemorrhage                                                               |
|                           | 431    | Intracerebral hemorrhage                                                | I61    | Intracerebral hemorrhage                                                              |
|                           | 432.x  | Other and unspecified intracranial hemorrhage                           | I62    | Other nontraumatic intracranial hemorrhage                                            |

Díaz Guzman J, *et al.* Epidemiology of atrial fibrillation-related ischemic stroke and its association with DOAC uptake in Spain: first national population-based study 2005 to 2018

|                                |     |                                                                   |     |                                                                                      |
|--------------------------------|-----|-------------------------------------------------------------------|-----|--------------------------------------------------------------------------------------|
| Other cerebrovascular diseases | 433 | (that are not .x1) occlusion and stenosis of precerebral arteries | I65 | Occlusion and stenosis of precerebral arteries, not resulting in cerebral infarction |
|                                | 434 | (that are not .x1) Occlusion of cerebral arteries                 | I66 | Occlusion and stenosis of cerebral arteries, not resulting in cerebral infarction    |
|                                | 436 | Acute but ill-defined cerebrovascular disease                     | I67 | Other cerebrovascular diseases                                                       |
|                                | 437 | Other and ill-defined cerebrovascular disease                     | I68 | Cerebrovascular disorders in diseases classified elsewhere                           |
|                                | 438 | Late effects of cerebrovascular disease                           | I69 | Sequelae of cerebrovascular disease                                                  |

ICD, International Classification of Diseases.

**Table 2 of the supplementary data.** ICD codes used for secondary diagnoses

| ICD-9  | Definition                       | ICD-10 | Definition                                               |
|--------|----------------------------------|--------|----------------------------------------------------------|
| 427.3  | Atrial fibrillation and flutter  | I48.x  | Atrial fibrillation and flutter                          |
| 427.31 |                                  |        |                                                          |
| 427.32 |                                  |        |                                                          |
| 401.x  | Essential (primary) hypertension | I10    | Essential (primary) hypertension                         |
|        |                                  | I16.x  | Hypertensive crisis                                      |
| 272.x  | Disorders of lipid metabolism    | E78.x  | Disorders of lipoprotein metabolism and other lipidemias |
|        |                                  | E88.1  | Lipodystrophy, not elsewhere classified                  |
| 249.x  | Secondary diabetes mellitus      | E10.x  | Type 1 diabetes mellitus                                 |
| 250.x  | Diabetes mellitus                | E11.x  | Type 2 diabetes mellitus                                 |
|        |                                  | E13.x  | Other specified diabetes mellitus                        |
| 428.x  | Heart failure                    | I50.x  | Heart failure                                            |

Díaz Guzman J, *et al.* Epidemiology of atrial fibrillation-related ischemic stroke and its association with DOAC uptake in Spain: first national population-based study 2005 to 2018

|       |                                                          |       |                                                                     |
|-------|----------------------------------------------------------|-------|---------------------------------------------------------------------|
| 413.x | Angina pectoris                                          | I20.x | Angina pectoris                                                     |
| 410.x | Acute myocardial infarction                              | I21.x | Acute myocardial infarction                                         |
| 412   | Old myocardial infarction                                | I22.x | Subsequent myocardial infarction                                    |
|       |                                                          | I23.x | Certain current complications following acute myocardial infarction |
| 411.x | Other acute and subacute forms of ischemic heart disease | I24.x | Other acute ischemic heart diseases                                 |
| 414.x | Other forms of chronic ischemic heart disease            | I25.x | Chronic ischemic heart disease                                      |
| 425.x | Cardiomyopathy                                           | I42.x | Cardiomyopathy                                                      |
|       |                                                          | I43   | Cardiomyopathy in diseases classified elsewhere                     |
| 429.9 | Heart disease, unspecified                               | I51.9 | Heart disease, unspecified                                          |

ICD, International Classification of Diseases.

**Table 3 of the supplementary data.** Crude incidence rates (per 10,000 person/y) of AF-related ischemic stroke

|                         |          | 2005  | 2006  | 2007  | 2008  | 2009  | 2010  | 2011  | 2012  | 2013  | 2014  | 2015  | 2016  | 2017  | 2018  |
|-------------------------|----------|-------|-------|-------|-------|-------|-------|-------|-------|-------|-------|-------|-------|-------|-------|
| <i>Whole population</i> | All ages | 2.78  | 3.01  | 3.14  | 3.37  | 3.43  | 3.60  | 3.60  | 3.80  | 3.88  | 3.88  | 3.97  | 3.88  | 4.15  | 4.29  |
|                         | 65-74    | 6.72  | 6.65  | 7.15  | 7.62  | 7.16  | 7.72  | 7.11  | 7.53  | 7.24  | 7.28  | 7.18  | 6.99  | 7.29  | 7.63  |
|                         | 75-84    | 21.29 | 22.23 | 22.63 | 23.77 | 24.32 | 24.53 | 24.12 | 25.19 | 25.57 | 24.46 | 24.92 | 24.13 | 25.08 | 24.80 |
|                         | ≥85      | 39.94 | 47.60 | 48.55 | 51.84 | 52.35 | 53.11 | 51.86 | 51.91 | 52.30 | 51.24 | 51.67 | 48.16 | 51.61 | 53.55 |
| <i>Women</i>            | All ages | 3.19  | 3.51  | 3.65  | 3.87  | 4.00  | 4.16  | 4.12  | 4.33  | 4.36  | 4.36  | 4.37  | 4.25  | 4.52  | 4.66  |
|                         | 65-74    | 5.79  | 5.80  | 6.25  | 6.55  | 6.30  | 6.73  | 5.80  | 6.44  | 6.09  | 5.90  | 5.59  | 5.56  | 5.75  | 5.87  |
|                         | 75-84    | 20.86 | 22.02 | 22.57 | 23.14 | 23.97 | 24.19 | 23.56 | 24.74 | 24.58 | 23.69 | 23.76 | 22.75 | 23.78 | 23.54 |
|                         | ≥85      | 39.97 | 47.82 | 48.14 | 52.00 | 52.82 | 52.79 | 52.34 | 51.43 | 51.50 | 50.96 | 50.62 | 49.28 | 51.95 | 54.02 |
| <i>Men</i>              | All ages | 2.36  | 2.49  | 2.61  | 2.86  | 2.84  | 3.03  | 3.10  | 3.25  | 3.38  | 3.37  | 3.55  | 3.47  | 3.76  | 3.90  |
|                         | 65-74    | 7.82  | 7.65  | 8.20  | 8.86  | 8.16  | 8.86  | 8.61  | 8.76  | 8.55  | 8.84  | 8.99  | 8.67  | 9.13  | 9.70  |
|                         | 75-84    | 21.93 | 22.55 | 22.70 | 24.69 | 24.81 | 25.02 | 24.90 | 25.83 | 26.95 | 25.53 | 26.52 | 26.34 | 27.34 | 26.98 |
|                         | ≥85      | 35.93 | 42.55 | 44.78 | 46.63 | 46.52 | 49.14 | 46.44 | 48.62 | 49.60 | 47.63 | 49.16 | 46.11 | 51.78 | 53.39 |

AF, atrial fibrillation.

Díaz Guzman J, *et al.* Epidemiology of atrial fibrillation-related ischemic stroke and its association with DOAC uptake in Spain: first national population-based study 2005 to 2018

**Table 4 of the supplementary data.** IRR calculated with the crude IR for the period before (2012-2005) and after (2018-2012) DOAC penetration

|                           |             | IRR 2012-2005<br>(95%CI) | IRR 2018-2012<br>(95%CI) |
|---------------------------|-------------|--------------------------|--------------------------|
| <i>General population</i> | All ages, y | 1.37 (1.34-1.40)         | 1.13 (1.11-1.15)         |
|                           | 65-74       | 1.12 (1.06-1.18)         | 1.01 (0.96-1.07)         |
|                           | 75-84       | 1.18 (1.14-1.23)         | 0.98 (0.95-1.02)         |
|                           | ≥85         | 1.30 (1.24-1.36)         | 1.03 (1.00-1.07)         |
| <i>Women</i>              | All ages, y | 1.36 (1.32-1.40)         | 1.08 (1.05-1.11)         |
|                           | 65-74       | 1.11 (1.03-1.20)         | 0.91 (0.84-0.98)         |
|                           | 75-84       | 1.19 (1.13-1.24)         | 0.95 (0.91-0.99)         |
|                           | ≥85         | 1.29 (1.22-1.36)         | 1.05 (1.01-1.10)         |
| <i>Men</i>                | All ages, y | 1.38 (1.33-1.43)         | 1.20 (1.16-1.24)         |
|                           | 65-74       | 1.12 (1.04-1.21)         | 1.11 (1.04-1.18)         |
|                           | 75-84       | 1.18 (1.12-1.24)         | 1.04 (0.99-1.10)         |
|                           | ≥85         | 1.35 (1.24-1.47)         | 1.10 (1.03-1.17)         |

The IRRs were calculated by dividing the crude incidence rates of the 2 years of interest. CI, confidence interval; IR, incidence rate; IRR, incidence rate ratio.

Díaz Guzman J, *et al.* Epidemiology of atrial fibrillation-related ischemic stroke and its association with DOAC uptake in Spain: first national population-based study 2005 to 2018

**Figure 1 of the supplementary data.** Trend in the incidence rate of AF-related ischemic stroke in the general population and percentage of DOAC uptake

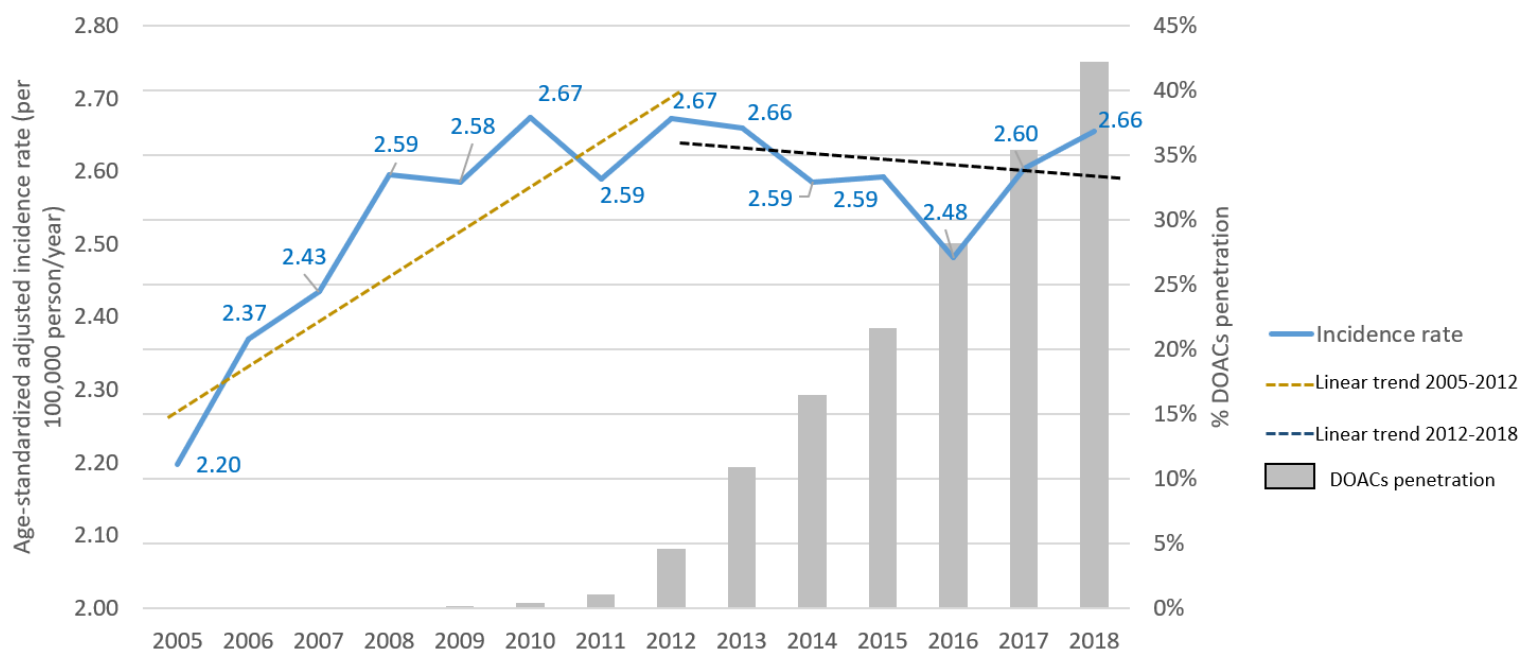

In 2016, the ICD coding switched from ICD-9 to ICD-10. This switch caused an incorrect registration of some diagnosis and an underestimation of the total number of diagnoses. Incidence rates from 2016 and 2017 should be interpreted with caution (especially 2016). Abbreviations: AF, atrial fibrillation; DOACs, direct oral anticoagulants.
